# Supplementary material for: Carbon Monoxide Partially Mediates Protective Effect of Resveratrol Against UVB-Induced Oxidative Stress in Human Keratinocytes
Source: MDPI journal article supplement (doi:10.3390/antiox8100432), 2019-10-01
Supplement: s1 [file s1]

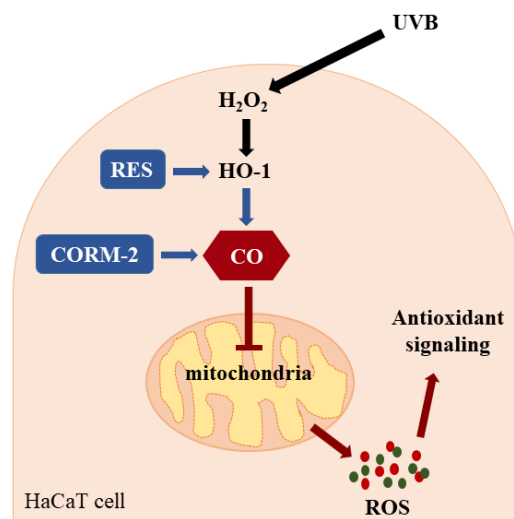

**Figure 1. Hypothetical mechanism for the cytoprotective effect of RES and CORM-2 under oxidative conditions.** The current work highlights the role of intracellular CO in maintaining cellular homeostasis by upregulating the stress-inducible antioxidant enzymes to enhance cellular detoxification and ultimately maintaining redox balance in HaCaT cells.

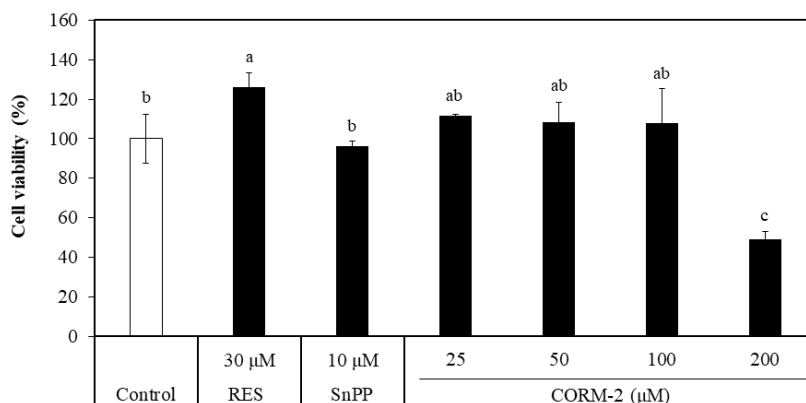

**Figure 2. Viability of HaCaT cells treated with various concentrations of CORM-2.** As concentrations above 100 μM CORM-2 were found to be cytotoxic to HaCaT cells, 100 μM was selected as the suitable treatment concentration for this study. In addition, non-cytotoxic concentrations of RES and SnPP were used consistently in this study. Cells were incubated with RES, CORM-2, or SnPP for 24 hrs and cytotoxicity was measured by CCK-8 assay. Results represent mean ± SD (N = 3). Bars not sharing common letters indicate significant differences ( $p < 0.05$ ), as evaluated using one-way ANOVA followed by the Duncan multiple-range test. Control, DMSO; RES, resveratrol; CORM-2, CO-releasing molecule-2, SnPP, tin protoporphyrin IX.

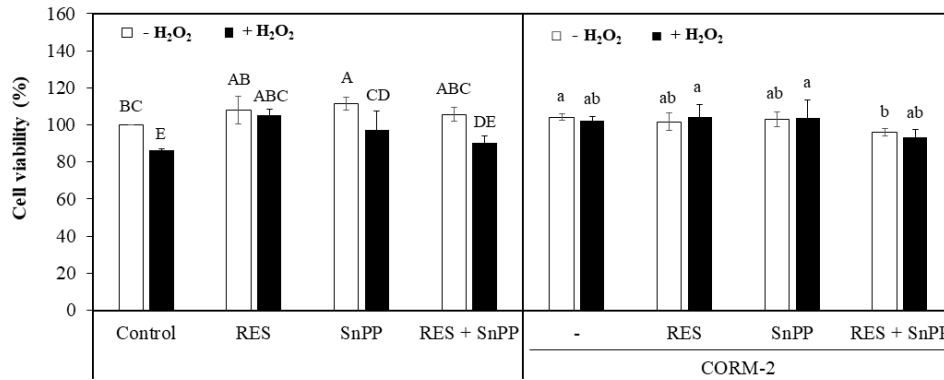

**Figure 3. Viability of H<sub>2</sub>O<sub>2</sub>-exposed HaCaT cells pre-treated with RES and/or CORM-2.** CORM-2 and RES increased the viability of HaCaT cells exposed to H<sub>2</sub>O<sub>2</sub>-induced cytotoxicity. Thus, RES and CORM-2 exhibit cytoprotective effect against H<sub>2</sub>O<sub>2</sub>-induced oxidative damage. Cells were pre-treated with RES, CORM-2, and/or SnPP and then exposed to H<sub>2</sub>O<sub>2</sub>. Results represent mean  $\pm$  SD (n = 3). Bars not sharing common letters indicate significant differences ( $p < 0.05$ ), as evaluated using one-way ANOVA followed by the Duncan multiple-range test. Control, DMSO; RES, resveratrol (30  $\mu$ M); CORM-2, CO-releasing molecule-2 (100  $\mu$ M), SnPP, tin protoporphyrin IX (10  $\mu$ M).
